# Supplementary material for: The Cell Cycle Regulated Transcriptome of Trypanosoma brucei
Source: PLoS One. 2011 Mar 31;6(3):e18425. doi: 10.1371/journal.pone.0018425 (PMC3069104; doi:10.1371/journal.pone.0018425)
Supplement: Table S3 — Categorization of genes in DNA-related processes, flagellar proteins, mitosis/cytokinesis effector proteins and RBPs using TriTrypDB text searches, proteomics studies, literature surveys or protein domain interrogation respectively. (XLS) [file pone.0018425.s005.xls]

## Sheet: Sheet1
Snl2 dependent PFR	General Flagellar	DNA (text search)	Histones (text search)
Tb09.211.4513	Tb11.02.4320	Tb09.244.2820	Tb927.1.2430
Tb10.26.0680	Tb927.4.4040	Tb927.5.2780	Tb927.1.2450
Tb10.389.0100	Tb10.6k15.0140	Tb927.5.2790	Tb927.1.2470
Tb10.61.1260	Tb10.70.7330	Tb927.7.3990	Tb927.1.2490
Tb10.6k15.0140	Tb09.160.1660	Tb10.70.5940	Tb927.1.2510
Tb10.6k15.0810	Tb927.3.3690	Tb11.01.0910	Tb927.1.2530
Tb10.6k15.1510	Tb10.6k15.0810	Tb11.01.1280	Tb927.1.2550
Tb11.01.3000	Tb927.7.4460	Tb927.4.2000	Tb927.2.2670
Tb11.01.4623	Tb927.8.4970	Tb927.7.600	Tb927.5.4170
Tb11.01.5100	Tb11.01.1625	Tb927.7.610	Tb927.5.4180
Tb11.01.6300	Tb927.3.4290	Tb927.8.700	Tb927.5.4190
Tb11.01.6510	Tb10.61.1550	Tb927.8.3560	Tb927.5.4200
Tb11.01.6740	Tb11.01.6740	Tb927.8.4880	Tb927.5.4210
Tb5.20	Tb10.389.1320	Tb10.70.7240	Tb927.5.4220
Tb11.02.2350	Tb11.01.4623	Tb11.02.2300	Tb927.5.4230
Tb927.2.2160	Tb927.3.3770	Tb11.02.4730	Tb927.5.4240
Tb927.2.3660	Tb927.6.4140	Tb11.02.4740	Tb927.5.4250
Tb927.2.4330	Tb10.26.0680	Tb11.01.0080	Tb927.5.4260
Tb927.2.5660	Tb11.02.5550	Tb11.01.0010	Tb927.7.2820
Tb927.2.950	Tb927.3.3750	Tb11.01.0020	Tb927.7.2830
Tb927.3.3750	Tb11.01.6780	Tb11.01.0030	Tb927.7.2840
Tb927.3.3770	Tb927.6.4520	Tb11.01.0040	Tb927.7.2850
Tb927.3.4290	Tb09.160.3590	Tb11.01.0050	Tb927.7.2860
Tb927.6.3670	Tb927.7.6910	Tb11.01.0060	Tb927.7.2870
Tb927.6.4140	Tb927.8.6660	Tb11.12.0002	Tb927.7.2880
Tb927.7.1920	Tb10.70.4840	Tb11.01.3660	Tb927.7.2890
Tb927.8.1550	Tb11.01.3000	Tb11.01.7950	Tb927.7.2900
Tb927.8.3790	Tb11.01.6510	Tb927.6.4780	Tb927.7.2910
Tb927.8.4970	Tb927.4.1040	Tb09.211.1820	Tb927.7.2920
Tb927.8.6660	Tb10.70.5560	Tb927.2.1800	Tb927.7.2930
Tb10.70.7330	Tb11.02.4230	Tb927.3.1130	Tb927.7.2940
	Tb927.8.810	Tb927.3.5030	Tb927.7.6360
	Tb927.8.3790	Tb927.4.2950	Tb11.55.0001
	Tb927.5.1880	Tb927.6.3890	Tb11.42.0005
	Tb11.1220	Tb927.8.3290	Tb11.02.5250
	Tb11.47.0006	Tb09.211.3310	Tb10.406.0460
	Tb11.02.2060	Tb11.02.0770	Tb10.406.0450
	Tb11.01.5100	Tb11.02.3250	Tb10.406.0440
	Tb927.8.1550	Tb11.02.3360	Tb10.406.0430
	Tb11.01.3550	Tb11.01.0360	Tb10.406.0420
	Tb927.6.1400	Tb11.01.1310	Tb10.406.0410
	Tb927.1.2400	Tb11.01.6520	Tb10.406.0400
	Tb10.6k15.1510	Tb927.4.1330	Tb10.406.0390
	Tb927.1.2670	Tb09.211.1210	Tb10.406.0380
	Tb11.18.0003	Tb11.02.0150	Tb10.406.0370
	Tb05.5K5.40	Tb11.01.4440	Tb10.406.0360
	Tb927.2.5760	Tb927.3.5230	Tb10.406.0350
	Tb11.01.2800	Tb927.4.2480	Tb10.406.0340
	Tb927.2.2160	Tb927.8.5980	Tb10.406.0330
	Tb11.02.2210	Tb09.160.3710	Tb10.61.1090
	Tb11.01.7750	Tb10.70.6190
	Tb927.5.1230	Tb10.70.2740
	Tb11.01.6870	Tb11.02.4880
	Tb927.8.5440	Tb11.01.1100
	Tb927.3.1900	Tb11.01.1950
	Tb927.3.2310	Tb927.2.3930
	Tb927.7.3740	Tb927.8.1210
	Tb927.5.2850	Tb09.211.2870
	Tb10.70.2280	Tb10.70.4390
	Tb10.406.0550	Tb11.02.3270
	Tb10.6k15.1830	Tb11.02.5730
	Tb09.211.0775	Tb11.12.0019
	Tb10.70.0480	Tb11.12.0001
	Tb09.211.2540	Tb11.12.0003
	Tb09.211.1370	Tb11.01.3510
	Tb09.211.1790	Tb11.01.4070
	Tb927.8.2630	Tb10.v4.0038
	Tb927.5.4480	Tb927.2.5750
	Tb11.02.1260	Tb927.3.1360
	Tb09.211.0890	Tb927.3.5100
	Tb09.211.4513	Tb927.3.5440
	Tb11.01.2670	Tb927.4.460
	Tb10.70.7560	Tb927.4.1270
	Tb10.70.5350	Tb927.5.3670
	Tb11.01.8650	Tb927.6.3580
	Tb927.7.4570	Tb927.6.5110
	Tb11.02.0990	Tb927.7.1000
	Tb927.5.1690	Tb927.7.2060
	Tb11.57.0008	Tb927.7.2310
	Tb09.160.5560	Tb927.7.4080
	Tb11.02.2130	Tb927.7.4650
	Tb11.01.4390	Tb927.8.3350
	Tb927.5.1900	Tb927.8.6540
	Tb10.6k15.0710	Tb927.8.6690
	Tb927.8.6240	Tb927.8.6740
	Tb927.2.4330	Tb09.160.2990
	Tb927.8.4640	Tb09.160.4090
	Tb927.1.2390	Tb09.160.5070
	Tb927.8.4870	Tb09.211.3040
	Tb09.211.3955	Tb10.70.3870
	Tb11.01.3010	Tb10.70.0820
	Tb927.4.4690	Tb10.6k15.1600
	Tb11.01.0390	Tb10.6k15.1480
	Tb927.7.6890	Tb10.6k15.1460
	Tb10.70.4610	Tb10.26.1030
	Tb09.211.1470	Tb10.26.0940
	Tb11.01.6840	Tb10.61.2910
	Tb10.6k15.3460	Tb11.03.0400
	Tb10.6k15.1760	Tb11.02.2930
	Tb10.70.7320	Tb11.02.3110
	Tb927.3.1200	Tb11.02.3400
	Tb927.8.3250	Tb11.02.3530
	Tb927.4.870	Tb11.02.4580
	Tb927.5.2950	Tb11.02.5060
	Tb10.61.2210	Tb11.01.0530
	Tb09.211.2250	Tb11.01.0340
	Tb10.61.2220	Tb11.01.2410
	Tb927.7.6970	Tb11.01.2500
	Tb11.02.1500	Tb11.01.3390
	Tb927.6.4710	Tb11.01.4170
	Tb927.8.6230	Tb11.01.6420
	Tb11.02.0760	Tb11.01.8090
	Tb10.6k15.2670
	Tb10.26.0070
	Tb09.160.2070
	Tb10.6k15.2920
	Tb09.244.2800
	Tb927.4.4700
	Tb11.02.1190
	Tb09.211.0170
	Tb09.160.4520
	Tb927.7.6280
	Tb11.01.1210
	Tb927.6.5030
	Tb11.0845
	Tb927.6.570
	Tb11.01.2310
	Tb11.47.0034
	Tb927.1.990
	Tb927.8.4580
	Tb927.2.4810
	Tb09.160.3930
	Tb927.8.8200
	Tb927.3.930
	Tb927.7.4910
	Tb11.02.2530
	Tb927.7.3310
	Tb927.8.5830
	Tb927.4.2600
	Tb11.01.4400
	Tb11.02.0170
	Tb11.01.8640
	Tb927.6.2720
	Tb927.7.4510
	Tb11.02.4380
	Tb09.160.0650
	Tb927.4.3950
	Tb927.3.1670
	Tb11.02.0860
	Tb927.3.5310
	Tb11.01.4030
	Tb11.02.4150
	Tb927.8.3530
